# Supplementary material for: Influence of oral contrast type and volume on patient experience and quality of luminal distension at MR Enterography in Crohn’s disease: an observational study of patients recruited to the METRIC trial
Source: Springer Nature journal article supplement (doi:10.1007/s00330-022-08614-9), 2022-03-03

## European Radiology

# Influence of oral contrast type and volume on patient experience and quality of luminal distension at MR Enterography in Crohn's disease: An observational study of patients recruited to the \*BLINDED\* trial

--Manuscript Draft--

|                                                      |                                                                                                                                                                                                                                                                                                                                                                                                                                                                                                                                                                                                                                                                                                                                                                                                                                                                                                                                                                                                                                                                                                                                                                                                                                                                                                                                                                                                                                                                                                                                                                                                                                                                                                                                                                                                                                                                                                                                                                                                        |                     |
|------------------------------------------------------|--------------------------------------------------------------------------------------------------------------------------------------------------------------------------------------------------------------------------------------------------------------------------------------------------------------------------------------------------------------------------------------------------------------------------------------------------------------------------------------------------------------------------------------------------------------------------------------------------------------------------------------------------------------------------------------------------------------------------------------------------------------------------------------------------------------------------------------------------------------------------------------------------------------------------------------------------------------------------------------------------------------------------------------------------------------------------------------------------------------------------------------------------------------------------------------------------------------------------------------------------------------------------------------------------------------------------------------------------------------------------------------------------------------------------------------------------------------------------------------------------------------------------------------------------------------------------------------------------------------------------------------------------------------------------------------------------------------------------------------------------------------------------------------------------------------------------------------------------------------------------------------------------------------------------------------------------------------------------------------------------------|---------------------|
| <b>Manuscript Number:</b>                            | EURA-D-21-04028R1                                                                                                                                                                                                                                                                                                                                                                                                                                                                                                                                                                                                                                                                                                                                                                                                                                                                                                                                                                                                                                                                                                                                                                                                                                                                                                                                                                                                                                                                                                                                                                                                                                                                                                                                                                                                                                                                                                                                                                                      |                     |
| <b>Full Title:</b>                                   | Influence of oral contrast type and volume on patient experience and quality of luminal distension at MR Enterography in Crohn's disease: An observational study of patients recruited to the *BLINDED* trial                                                                                                                                                                                                                                                                                                                                                                                                                                                                                                                                                                                                                                                                                                                                                                                                                                                                                                                                                                                                                                                                                                                                                                                                                                                                                                                                                                                                                                                                                                                                                                                                                                                                                                                                                                                          |                     |
| <b>Article Type:</b>                                 | Original Article                                                                                                                                                                                                                                                                                                                                                                                                                                                                                                                                                                                                                                                                                                                                                                                                                                                                                                                                                                                                                                                                                                                                                                                                                                                                                                                                                                                                                                                                                                                                                                                                                                                                                                                                                                                                                                                                                                                                                                                       |                     |
| <b>Funding Information:</b>                          | Health Technology Assessment Programme (11/23/01)                                                                                                                                                                                                                                                                                                                                                                                                                                                                                                                                                                                                                                                                                                                                                                                                                                                                                                                                                                                                                                                                                                                                                                                                                                                                                                                                                                                                                                                                                                                                                                                                                                                                                                                                                                                                                                                                                                                                                      | Prof. Stuart Taylor |
| <b>Abstract:</b>                                     | <p><b>Objectives</b><br/>To compare the distention quality and patient experience of oral mannitol and polyethylene glycol (PEG) for MRE.</p> <p><b>Methods</b><br/>This study is a retrospective, observational study of a subset of patients enrolled in a multicenter, prospective trial evaluating the diagnostic accuracy of MRE for small bowel Crohn's. Overall and segmental small bowel distention, from 105 patients (64F, mean age 37) was scored from 0=poor to 4=excellent by two experienced observers (68[65%]mannitol and 37[35%]PEG). Additionally, 130 patients (77F, mean age 34) completed a questionnaire rating tolerability of various symptoms immediately and 2 days after MRE (85[65%]receiving mannitol 45[35%]receiving PEG). Distension was compared between agents, and between those ingesting <math>\leq 1L</math> or <math>&gt;1L</math> of mannitol using the test of proportions. Tolerability grades were collapsed into "Very tolerable", "Moderately tolerable" and "Not tolerable"</p> <p><b>Results</b><br/>Per patient distension quality was similar between agents ("excellent" or "good" in 54%[37/68] verses 46%[17/37] with mannitol and PEG respectively. Jejunal distension was significantly better with mannitol compared to PEG (40% [27/68] verses 14%[5/37] rated as excellent or good respectively). There was no significant difference according to the volume of mannitol ingested.<br/>Symptom tolerability was comparable between agents, although fullness following MRE was graded as 'very tolerable' in 27%[12/45] of patients ingesting PEG, verses 44%[37/84] ingesting mannitol, difference 17%(95%CI 0.6 to 34%).</p> <p><b>Conclusion</b><br/>Mannitol-based solutions and PEG generally achieve comparable distension quality and side effect profiles, although jejunal distension is better quality with mannitol. Neither distension quality nor side-effect profile are altered by ingestion of more than 1L of mannitol.</p> |                     |
| <b>Corresponding Author:</b>                         | Stuart A Taylor<br>University College London<br>London, UNITED KINGDOM                                                                                                                                                                                                                                                                                                                                                                                                                                                                                                                                                                                                                                                                                                                                                                                                                                                                                                                                                                                                                                                                                                                                                                                                                                                                                                                                                                                                                                                                                                                                                                                                                                                                                                                                                                                                                                                                                                                                 |                     |
| <b>Corresponding Author Secondary Information:</b>   |                                                                                                                                                                                                                                                                                                                                                                                                                                                                                                                                                                                                                                                                                                                                                                                                                                                                                                                                                                                                                                                                                                                                                                                                                                                                                                                                                                                                                                                                                                                                                                                                                                                                                                                                                                                                                                                                                                                                                                                                        |                     |
| <b>Corresponding Author's Institution:</b>           | University College London                                                                                                                                                                                                                                                                                                                                                                                                                                                                                                                                                                                                                                                                                                                                                                                                                                                                                                                                                                                                                                                                                                                                                                                                                                                                                                                                                                                                                                                                                                                                                                                                                                                                                                                                                                                                                                                                                                                                                                              |                     |
| <b>Corresponding Author's Secondary Institution:</b> |                                                                                                                                                                                                                                                                                                                                                                                                                                                                                                                                                                                                                                                                                                                                                                                                                                                                                                                                                                                                                                                                                                                                                                                                                                                                                                                                                                                                                                                                                                                                                                                                                                                                                                                                                                                                                                                                                                                                                                                                        |                     |
| <b>First Author:</b>                                 | Gauraang Bhatnagar, FRCR                                                                                                                                                                                                                                                                                                                                                                                                                                                                                                                                                                                                                                                                                                                                                                                                                                                                                                                                                                                                                                                                                                                                                                                                                                                                                                                                                                                                                                                                                                                                                                                                                                                                                                                                                                                                                                                                                                                                                                               |                     |
| <b>First Author Secondary Information:</b>           |                                                                                                                                                                                                                                                                                                                                                                                                                                                                                                                                                                                                                                                                                                                                                                                                                                                                                                                                                                                                                                                                                                                                                                                                                                                                                                                                                                                                                                                                                                                                                                                                                                                                                                                                                                                                                                                                                                                                                                                                        |                     |
| <b>Order of Authors:</b>                             | Gauraang Bhatnagar, FRCR                                                                                                                                                                                                                                                                                                                                                                                                                                                                                                                                                                                                                                                                                                                                                                                                                                                                                                                                                                                                                                                                                                                                                                                                                                                                                                                                                                                                                                                                                                                                                                                                                                                                                                                                                                                                                                                                                                                                                                               |                     |
|                                                      | Sue Mallett                                                                                                                                                                                                                                                                                                                                                                                                                                                                                                                                                                                                                                                                                                                                                                                                                                                                                                                                                                                                                                                                                                                                                                                                                                                                                                                                                                                                                                                                                                                                                                                                                                                                                                                                                                                                                                                                                                                                                                                            |                     |

|                                                |                                                                                                                                                                                                                                                                                                                                                                                                                                                                                                                                                                                                                                                                                                                                                                 |
|------------------------------------------------|-----------------------------------------------------------------------------------------------------------------------------------------------------------------------------------------------------------------------------------------------------------------------------------------------------------------------------------------------------------------------------------------------------------------------------------------------------------------------------------------------------------------------------------------------------------------------------------------------------------------------------------------------------------------------------------------------------------------------------------------------------------------|
|                                                | Laura Quinn, MSc                                                                                                                                                                                                                                                                                                                                                                                                                                                                                                                                                                                                                                                                                                                                                |
|                                                | Rajapandian Ilangovan, FRCR                                                                                                                                                                                                                                                                                                                                                                                                                                                                                                                                                                                                                                                                                                                                     |
|                                                | Uday Patel, PhD                                                                                                                                                                                                                                                                                                                                                                                                                                                                                                                                                                                                                                                                                                                                                 |
|                                                | Asif Jaffer, FRCR                                                                                                                                                                                                                                                                                                                                                                                                                                                                                                                                                                                                                                                                                                                                               |
|                                                | Christopher Pawley, FRCR                                                                                                                                                                                                                                                                                                                                                                                                                                                                                                                                                                                                                                                                                                                                        |
|                                                | Arun Gupta, FRCR                                                                                                                                                                                                                                                                                                                                                                                                                                                                                                                                                                                                                                                                                                                                                |
|                                                | Anthony Higginson, FRCR                                                                                                                                                                                                                                                                                                                                                                                                                                                                                                                                                                                                                                                                                                                                         |
|                                                | Andrew Slater, FRCR                                                                                                                                                                                                                                                                                                                                                                                                                                                                                                                                                                                                                                                                                                                                             |
|                                                | Damian Tolan, FRCR                                                                                                                                                                                                                                                                                                                                                                                                                                                                                                                                                                                                                                                                                                                                              |
|                                                | Ian Zealley, FRCR                                                                                                                                                                                                                                                                                                                                                                                                                                                                                                                                                                                                                                                                                                                                               |
|                                                | Steve Halligan, FMedSci                                                                                                                                                                                                                                                                                                                                                                                                                                                                                                                                                                                                                                                                                                                                         |
|                                                | Stuart Taylor, FRCR                                                                                                                                                                                                                                                                                                                                                                                                                                                                                                                                                                                                                                                                                                                                             |
| <b>Order of Authors Secondary Information:</b> |                                                                                                                                                                                                                                                                                                                                                                                                                                                                                                                                                                                                                                                                                                                                                                 |
| <b>Author Comments:</b>                        | <p>Dear Editor,</p> <p>Please see attached a revised resubmission of our manuscript entitled “Influence of oral contrast type and volume on patient experience and quality of luminal distension at MR Enterography in Crohn’s disease: An observational study of patients recruited to the BLINDED trial”. We have read the comments raised during the second review of this paper by your editors and have made all suggested positive changes to the manuscript. We include a detailed reply to the review comments as part of the submission. We hope the changes have satisfactorily modified the manuscript for your readership. We look forward to your re-review.</p> <p>Yours sincerely,</p> <p>Dr. Gauraang Bhatnagar<br/>Professor Stuart Taylor</p> |

Reviewer #1: European Radiology

EURA-D-21-04028

Influence of oral contrast type and volume on patient experience and quality of luminal distension at MR Enterography in Crohn's disease: An observational study of patients recruited to the "Blinded" trial.

|            | Reviewer comment                                                                                                                                                                                                                                                                                                                                                                                                                                                                                                                                                                                                                                                                                                                                                                                                                                             | Author response                                                                                                      |
|------------|--------------------------------------------------------------------------------------------------------------------------------------------------------------------------------------------------------------------------------------------------------------------------------------------------------------------------------------------------------------------------------------------------------------------------------------------------------------------------------------------------------------------------------------------------------------------------------------------------------------------------------------------------------------------------------------------------------------------------------------------------------------------------------------------------------------------------------------------------------------|----------------------------------------------------------------------------------------------------------------------|
| REV<br>1.1 | The opening sentence of the introduction is debatable. There are no data that support that MRE is the most sensitive and specific cross-sectional imaging modality for diagnosing and staging of small bowel Crohn's disease. I and many others would argue that CTE is just as sensitive and specific. Yes, there are some data that suggest that MRE can determine the fibrotic component of a stricture, but this has not been universally replicated. MRE in many instances is preferable over CTE as there is no ionizing radiation. There is however a very legitimate role of CTE for Crohn's disease, especially in the acute situation or where MR is not readily available. Lastly, an MRE with excessive patient motion and peristalsis, NOT an uncommon occurrence, is useless. That almost never happens with CTE. Please modify this statement | Amended as suggested.                                                                                                |
| REV<br>1.2 | Please reorder the methods section in the abstract. The study is a retrospective, observational study of a subset of patients enrolled in a multicenter, prospective study evaluating the diagnostic accuracy of MRE for small bowel Crohn's disease. Just starting with "Overall and segmental MRE small bowel distension..." isn't the best.                                                                                                                                                                                                                                                                                                                                                                                                                                                                                                               | Amended as suggested.                                                                                                |
| REV<br>1.3 | One thing that did not occur to me when I first reviewed the manuscript was whether there was any assessment of bowel distension as the MR sequences were performed. My impression is that the first sequences, in our case the initial coronal HASTE sequences, the mid to distal ileum is most distended when compared to the last pulse sequence in the exam, the 7 minute delayed post contrast VIBE sequence. It would have been interesting to see if there were any differences between the first and last sequence. This was not the design of the study and I'm not asking the authors to redo their assessment (as an author myself, I despise a reviewer asking me to do a different study than the one I did). But, it might be interesting for the authors to look at the sequences, from first to last, and                                    | Thank you for this comment. We agree this will be useful additional work and have added a comment to the discussion. |

|         |                                                                                                                                    |                       |
|---------|------------------------------------------------------------------------------------------------------------------------------------|-----------------------|
|         | see if one enteric agent more consistently distended the bowel. This could be a separate, new investigation worthy of publication. |                       |
| REV 1.4 | While not necessary to the discussion, the results are likely applicable to CTE and could be added to the discussion.              | Amended as suggested. |

**Influence of oral contrast type and volume on patient experience and quality of luminal distension at MR Enterography in Crohn's disease: An observational study of patients recruited to the METRIC trial**

**Authors**

Gauraang **Bhatnagar**<sup>1</sup> FRCR, Sue **Mallett**<sup>1</sup> D.Phil, Laura **Quinn**<sup>2</sup> MSc, Rajapandian **Ilangovan**<sup>3</sup> FRCR, Uday **Patel**<sup>3</sup> PhD, Asif **Jaffer**<sup>1</sup> FRCR, Christopher **Pawley**<sup>1</sup> FRCR, Arun **Gupta**<sup>3</sup> FRCR, Anthony **Higginson**<sup>4</sup> FRCR, Andrew **Slater**<sup>5</sup> FRCR, Damian **Tolan**<sup>6</sup> FRCR, Ian **Zealley**<sup>7</sup> FRCR, Steve **Halligan**<sup>1</sup> FMedSci, Stuart **Taylor**<sup>1</sup> FRCR on behalf of the METRIC study investigators

**Author affiliations**

1. Centre for Medical Imaging, University College London, Charles Bell House, 43-45 Foley Street, W1W 7TS
2. Institute of Applied Health Research, NIHR Birmingham Biomedical Research Centre, College of Medical and Dental Sciences, University of Birmingham, Edgbaston, Birmingham, B15 2TT, UK
3. Intestinal Imaging Centre, St Mark's Hospital, LNWUH NHS Trust, Harrow, UK
4. Department of Radiology, Portsmouth Hospitals NHS Trust, Portsmouth, UK
5. Department of Radiology, Oxford University Hospitals NHS Trust, Oxford, UK
6. Department of Radiology, St James's University Hospital, Leeds Teaching Hospitals NHS Trust, Beckett Street, Leeds, LS9 7TF, UK
7. Department of Radiology, Ninewells Hospital, Dundee, DD1 9SY, Scotland, UK

**Corresponding author**

Stuart A Taylor, Centre for Medical Imaging, University College London, Charles  
Bell House, 43-45 Foley Street, W1W 7TS. Email [stuart.taylor@ucl.ac.uk](mailto:stuart.taylor@ucl.ac.uk). Tel  
07960169321

1  
2 **Influence of oral contrast type and volume on patient experience and**  
3  
4  
5 **quality of luminal distension at MR Enterography in Crohn's disease:**  
6  
7  
8 **An observational study of patients recruited to the METRIC trial**  
9

10  
11  
12 **Abstract**

13 ***Objectives***

14  
15  
16 To compare the distention quality and patient experience of oral mannitol and  
17  
18 polyethylene glycol (PEG) for MRE.  
19

20  
21 ***Methods***

22  
23 This study is a retrospective, observational study of a subset of patients enrolled  
24  
25 in a multicenter, prospective trial evaluating the diagnostic accuracy of MRE for  
26  
27 small bowel Crohn's. Overall and segmental MRE small bowel distention, from  
28  
29 105 patients (64F, mean age 37) was scored from 0=poor to 4=excellent by two  
30  
31 experienced observers (68[65%] mannitol and 37[35%] PEG). Additionally, 130  
32  
33 patients (77F, mean age 34) completed a questionnaire rating tolerability of  
34  
35 various symptoms immediately and 2 days after MRE (85[65%] receiving  
36  
37 mannitol 45[35%] receiving PEG). Distension was compared between agents,  
38  
39 and between those ingesting  $\leq 1L$  or  $>1L$  of mannitol using the test of  
40  
41 proportions. Tolerability grades were collapsed into "Very tolerable",  
42  
43 "Moderately tolerable" and "Not tolerable"  
44  
45  
46  
47  
48  
49  
50

51  
52 ***Results***

53  
54 Per patient distension quality was similar between agents ("excellent" or "good"  
55  
56 in 54%[37/68] verses 46%[17/37] with mannitol and PEG respectively. Jejunal  
57  
58 distension was significantly better with mannitol compared to PEG (40%  
59  
60  
61  
62  
63  
64  
65

1 [27/68] verses 14%[5/37] rated as excellent or good respectively). There was  
2 no significant difference according to the volume of mannitol ingested.  
3

4  
5  
6 Symptom tolerability was comparable between agents, although fullness  
7 following MRE was graded as 'very tolerable' in 27%[12/45] of patients  
8 ingesting PEG, verses 44%[37/84] ingesting mannitol, difference 17%(95%CI  
9 0.6 to 34%).  
10  
11  
12  
13  
14  
15

### 16 ***Conclusion***

17  
18 Mannitol-based solutions and PEG generally achieve comparable distension  
19 quality and side effect profiles, although jejunal distension is better quality with  
20 mannitol. Neither distension quality nor side-effect profile are altered by  
21 ingestion of more than 1L of mannitol.  
22  
23  
24  
25  
26  
27  
28  
29  
30  
31

### 32 **Keywords**

- 33 1. Crohn's Disease
  - 34 2. Diagnostic imaging
  - 35 3. Magnetic Resonance Imaging
- 36  
37  
38  
39  
40  
41  
42  
43  
44

### 45 **Key points**

- 46 • Mannitol-based and PEG based oral preparation agents generally achieve  
47 comparable distension quality for MRE with the exception of the jejunum  
48 which is better distended with mannitol.  
49
- 50 • Mannitol-based and PEG based oral preparation agents used for MRE  
51 have similar side effect profiles.  
52  
53  
54  
55  
56  
57  
58  
59  
60  
61  
62  
63  
64  
65



- Neither distension quality nor side-effect profile are altered by ingestion of more than 1L of mannitol.

## Abbreviations

CD - Crohn's disease

ESGAR - European Society of Gastrointestinal and Abdominal Radiology

METRIC Trial – MR Enterography or ulTRAsound In Crohn's disease

MRE - Magnetic Resonance Enterography

PEG - Polyethylene Glycol

SBU - Small bowel ultrasound

## Introduction

1  
2  
3  
4  
5 Cross sectional imaging is sensitive and specific for diagnosing and staging of  
6  
7 small bowel Crohn's disease (CD). Magnetic resonance enterography (MRE) has  
8  
9 the advantage of not exposing patients to ionising radiation. [1]. It relies upon  
10  
11 the combination of good small bowel distension and multi-parametric sequences  
12  
13 to accurately identify disease and phenotype as either predominantly  
14  
15 inflammatory or fibrostenotic [2, 3]. Diagnostic accuracy pivots on the quality of  
16  
17 luminal distension; poor distension can both conceal or mimic disease, leading to  
18  
19 misdiagnosis. Distension is influenced by the type and volume of oral  
20  
21 preparation agent ingested and a variety of protocols are used clinically [4–7]. A  
22  
23 recent literature review by the European Society of Gastrointestinal and  
24  
25 Abdominal Radiology (ESGAR) found no evidence for superiority of one oral  
26  
27 preparation over another, and made no specific recommendation on either the  
28  
29 optimal agent, nor ingested volume [8].  
30  
31  
32  
33  
34  
35  
36  
37  
38  
39

40 Whilst MRE is generally well tolerated, compared to small bowel ultrasound  
41  
42 (SBU), it is more burdensome and causes symptoms, such that SBU is usually  
43  
44 preferred by patients [9]. Gastrointestinal effects related to the agent are most  
45  
46 commonly cited by patients as the least acceptable characteristic of MRE [9].  
47  
48  
49  
50  
51

52 The existing literature investigating oral preparation agents has largely focused  
53  
54 on a small number of healthy individuals at single centres [5, 10–15]. Findings  
55  
56 may not generalise to the (often) symptomatic patients undergoing MRE. Indeed,  
57  
58  
59  
60  
61  
62  
63  
64  
65

1  
2  
3  
4  
5  
6  
7  
8  
9  
10  
11  
12  
13  
14  
15  
16  
17  
18  
19  
20  
21  
22  
23  
24  
25  
26  
27  
28  
29  
30  
31  
32  
33  
34  
35  
36  
37  
38  
39  
40  
41  
42  
43  
44  
45  
46  
47  
48  
49  
50  
51  
52  
53  
54  
55  
56  
57  
58  
59  
60  
61  
62  
63  
64  
65

surprisingly few studies have investigated oral contrast agents in patients [16–18].

We conducted a prospective multi-centre study comparing the diagnostic accuracy of MRE with SBU in Crohn’s disease [1, 19] . The study afforded the pragmatic opportunity to prospectively compare two commonly used MRE oral contrast agents, mannitol and polyethylene glycol (PEG) exactly as they are employed in clinical practice, and was a pre-specified secondary outcome [19, 20]. Specifically, the aims of the current study were to compare, 1) distension quality and, 2) patient symptoms, according to the agent ingested. We also investigated the influence of ingested volume on image distention quality and patients’ symptoms.

## Materials and methods

### *Study Population*

This study was conducted as a pre-specified sub-study of a larger multi-centre, prospective cohort trial investigating the sensitivity of MRE and SBU. The trial recruited two patient cohorts: (1) newly diagnosed and, (2) established disease, clinically suspected of luminal relapse [1, 19]. Full ethical permission was obtained (NRES Committee September 2013 reference 13/SC/0394).

The current study was a sample of convenience based on, 1) receipt of MRE datasets from recruitment sites for central distension scoring during the course of the trial up until October 2015, 2) available information on oral contrast agent

1 type and volume ingested and, 3) return of completed patient experience  
2 questionnaires.  
3

4 The study cohort consisted of 114 (34%) of the 335 patients recruited to the  
5 main diagnostic accuracy trial. Of these 114, 9 patients were excluded  
6 subsequently (6 did not have a diagnosis of CD and 3 withdrew from the trial).  
7

8 The final cohort consisted of 105 patients recruited across 6 sites. Overall, 68  
9 [65%] received mannitol based oral preparation and 37 [35%] received PEG  
10 based oral preparation. A subset of 66 patients from the current study has been  
11 reported in part previously [20].  
12  
13  
14  
15  
16  
17  
18  
19  
20  
21

## 22 *Study Design*

### 23 *Imaging Protocol*

24 The main diagnostic accuracy trial was a pragmatic trial. As such, all recruitment  
25 sites used their usual clinical protocol for all MRE examinations. There was no  
26 specific stipulation as to the type of oral preparation agent to be used or volume  
27 to be ingested.  
28  
29  
30

31 This study included patients recruited from six of the eight centres that took part  
32 in the main trial. The remaining two centres had not provided data by the  
33 submission deadline for this substudy due to delays in commencing recruitment.  
34  
35

36 Four of the six sites used a mannitol based oral preparation regimen (two sites  
37 used mannitol 2.5% alone, one site used mannitol 2.5% & 0.2% Locust Bean  
38 Gum and one site used mannitol 2.5% & 2 scoops Carobel, Cow & Gate, Nutricia  
39 Ltd.). Two sites utilised a PEG oral preparation without additives (69g Klean  
40 prep/litre, Helsinn-Birex pharmaceuticals Ltd.). Full details of the differing oral  
41  
42  
43  
44  
45  
46  
47  
48  
49  
50  
51  
52  
53  
54  
55  
56  
57  
58  
59  
60  
61  
62  
63  
64  
65

1 prep regimens employed at all sites is provided in Appendix 8. Patients were  
2 instructed to drink the provided volume of oral preparation (1.5-2L) at a steady  
3 rate over a 45-60 minute period according to tolerance, and encouraged by  
4 radiography staff at regular intervals.  
5  
6  
7  
8  
9

10 A minimum dataset of sequences was acquired including T2-weighted images  
11 with and without fat saturation, steady state free precession gradient echo  
12 images, diffusion weighted images and T1-weighted images after intravenous  
13 gadolinium injection (see Appendix 1 for minimal MRE dataset).  
14  
15  
16  
17  
18  
19  
20

#### 21 *Recording MRE oral preparation details*

22 Recruitment sites were requested to record prospectively the exact volume of  
23 ingested contrast agent.  
24  
25  
26  
27  
28  
29

#### 30 *Patient experience questionnaires*

31 Patients recruited to the main diagnostic accuracy trial were invited to complete  
32 a three-part questionnaire asking their experience of various symptoms before  
33 and after oral preparation. The questionnaire was given to participants by  
34 radiographers. Patients were asked to complete a baseline questionnaire the  
35 day of their MRE but before ingesting the oral contrast, and to then complete a  
36 second questionnaire immediately after MRE. These were then handed to  
37 radiography staff. The third questionnaire was completed two days later, to  
38 capture symptoms for 48 hours post MRE. Patients were asked to return this  
39 either by hand or mail (stamped, addressed envelopes were provided). At each  
40 of the three time points, participants were asked to rate tolerability (“not at all  
41 tolerable”, “somewhat tolerable”, “moderately tolerable”, “very tolerable”) and  
42  
43  
44  
45  
46  
47  
48  
49  
50  
51  
52  
53  
54  
55  
56  
57  
58  
59  
60  
61  
62  
63  
64  
65

1 record symptoms of fullness, regurgitation, vomiting, abdominal pains/spasms  
2 and diarrhoea.  
3

4  
5 The questionnaire is reproduced in Appendix 2.  
6

### 7 8 *Grading of Bowel distension* 9

10 All MRE examinations were anonymised (for patient and site specific  
11 information) and uploaded to an online viewing platform (Biotronics 3Dnet,  
12 Biotronics 3D)  
13  
14  
15  
16

17  
18  
19  
20 Two Consultant gastrointestinal radiologists reporting MRE as part of their  
21 routine clinical work at a tertiary referral centre for 10 and 4 years respectively,  
22 reviewed all MREs independent of each other and performed qualitative  
23 distension grading in isolation. Observers were blinded to the oral contrast agent  
24 used and its volume.  
25  
26  
27  
28  
29  
30  
31

32  
33  
34  
35 The small bowel was divided into the duodenum, jejunum, ileum, and terminal  
36 ileum). The terminal ileum was defined as the terminal 10cm of small bowel. The  
37 jejunum was defined as the proximal bowel lying largely to the left of a diagonal  
38 line drawn from the right lower quadrant to the left lower quadrant,  
39 demonstrating a typical “feathery” fold pattern, and the ileum as the bowel  
40 interposed between jejunum and terminal ileum[19]. Right colonic segments  
41 (caecum, ascending colon and transverse colon) were defined as described  
42 previously [21].  
43  
44  
45  
46  
47  
48  
49  
50  
51  
52  
53  
54  
55  
56  
57  
58  
59  
60  
61  
62  
63  
64  
65

1 Segmental distension was graded qualitatively using the methods described by  
2 Saini et al [22] . Each small bowel and right colonic segment (caecum, ascending  
3 colon, transverse colon), was graded independently by each observer on a 5  
4 point scale: 0 - very poor distension; 1 - poor distension; 2 - fair distension; 3 -  
5 good distension; and 4 - excellent distension [5, 7, 15, 22]. The reviewers were  
6 instructed to use the entire image set as part of their assessment.  
7  
8  
9  
10  
11  
12  
13  
14  
15  
16  
17  
18  
19

20 Observers also scored the overall per-patient quality of small bowel distension  
21 using the same scale. Observers were free to use all MRE sequences when  
22 making their grading decision.  
23  
24  
25  
26  
27  
28  
29

### 30 *Statistical analysis*

31  
32

33 The frequency of “excellent” or “good” distension according to the type of oral  
34 contrast was calculated on a per-patient level and for individual intestinal  
35 segments. In cases of reader disagreement, the best distension score of the two  
36 was used for the main analysis but results from each individual reader are also  
37 presented . Per-patient and segmental distension scores were compared  
38 between the two oral contrast groups using the test of proportions. Distension  
39 scores were also compared according to the volume of mannitol ingested (1L or  
40 less vs. more than 1L). The distribution of data for the volume of PEG ingested  
41 was insufficient to undertake meaningful analysis for this agent.  
42  
43  
44  
45  
46  
47  
48  
49  
50  
51  
52  
53  
54  
55  
56  
57  
58  
59  
60  
61  
62  
63  
64  
65

1 For the purposes of analysis, tolerability grades were collapsed as follows; (1)  
2 Very tolerable (“I did not experience this symptom” and “very tolerable”), (2)  
3  
4 Moderately tolerable (combining “moderately” and “somewhat” tolerable) and  
5  
6  
7 (3) Not tolerable (“not at all tolerable”) and compared according to oral contrast  
8  
9 agent and volume of mannitol ingested (1L or less vs. more than 1L).  
10  
11

12  
13 Inter-observer variability for distension scores were analysed using Gwet’s  
14  
15 chance-adjusted agreement coefficient [23]. Strength of agreement was  
16  
17 interpreted using the Landis and Koch criteria [24]: < 0.00 = poor, 0.00–0.20 =  
18  
19 slight, 0.21–0.40 = fair, 0.41–0.60 = moderate, 0.61–0.80 = substantial, and 0.81–  
20  
21 1.00 = excellent.  
22  
23  
24  
25  
26  
27  
28  
29  
30  
31  
32  
33  
34  
35  
36  
37  
38  
39  
40  
41  
42  
43  
44  
45  
46  
47  
48  
49  
50  
51  
52  
53  
54  
55  
56  
57  
58  
59  
60  
61  
62  
63  
64  
65



## Results

### *Distension cohort*

#### *Patient characteristics*

Detailed patient characteristics are provided in Appendix 3. Importantly there was no important differences between the groups in potential confounders which could influence distension, notably presence of stenosis, prior resection and disease activity (as measured by the HBI and CRP).

The volumes of mannitol and PEG based oral preparation ingested is presented in Appendix 4. Of the 68 patients who ingested mannitol, 3 did not have information on volume ingested (and so were excluded from volume analysis). Overall, patients ingested between 200ml and 1.8L, and 49% [32/65] ingested more than 1L. Of the 37 patients who ingested PEG, the volume ranged between 300ml to 1.5L and 11% [4/35] patients drank more than 1L. Overall, 34% [22/65] ingested exactly 1L of mannitol and 35% [13/37] ingested exactly 1L of PEG.

#### *Qualitative distension assessment*

##### *Quality of luminal distension according to mannitol or PEG oral preparation*

Using the best distension score of the two readers, there was no significant difference in the proportion of patients achieving excellent or good distention between mannitol or PEG based preparations. Specifically, per-patient distension with mannitol based preparation was rated as excellent or good in 54% [37/68] verses 46% [17/37] with PEG based preparation (Percentage difference [95%CI] 8 [-11to 28]) (Table 1).

1  
2  
3  
4 At a segmental level, ileal distension quality was greater for both preparations,  
5  
6 followed by the terminal ileum and then jejunum (Table 1). Jejunal and  
7  
8 transverse colon segmental distension were significantly better distended in the  
9  
10 mannitol group in comparison to the PEG group (Table 1). This pattern was  
11  
12 consistent for both individual readers, reaching statistical significance for reader  
13  
14 2 in the jejunum (95% CI of difference in distension 11% to 37%) and reader 1 in  
15  
16 the transverse colon (95% CI of difference in distension 5% to 44%) (Appendix  
17  
18 9).

19  
20  
21  
22  
23  
24 In general, the distension quality grading were comparable across both  
25  
26 individual readers with the exception of the TI (appendix 9). Reader 1 graded a  
27  
28 greater proportion of TI segments as good/excellent distension on both  
29  
30 preparations (Mannitol 36 (53%) and PEG 15 (41%) versus Reader 2 (Mannitol  
31  
32 20 (29%) and PEG (24%)).

### 33 34 35 36 37 38 *Overall Inter-observer variability*

39  
40  
41 Table 3 demonstrates inter-reader agreement for patients/segments where the  
42  
43 two readers rated distention as “excellent” or “good”. On a per-patient basis,  
44  
45 there was substantial agreement between readers, with reader 1 rating 45%  
46  
47 [48/105] and reader 2 rating 42% [45/102] of MREs as achieving “excellent” or  
48  
49 “good” distention. There was excellent inter-reader agreement in assessing duodenal  
50  
51 distension (Gwet's AC=0.84 Gwet's AC 0.84 (10% and 8% assessed  
52  
53 good/excellent distension by the two readers)) but only fair for terminal ileal  
54  
55 distension (Gwet's AC=0.40 (49% and 28% assessed good/excellent distension by  
56  
57  
58  
59  
60  
61  
62  
63  
64  
65

1 the two readers)). There was substantial agreement in assessing jejunal distension  
2 (Gwet's AC = 0.68 assessed as good to excellent distension in only 20 and 21% by the  
3 two readers). There was moderate agreement for the ileum (Gwet's AC = 0.49  
4 (59% and 65% assessed good/excellent distension by the two readers)).  
5  
6  
7  
8  
9

### 10 *Impact of oral Mannitol volume ingested*

11 There was no significant difference in distension quality either overall or on a  
12 segmental basis according to the volume of mannitol ingested (1L or less vs  
13 more than 1L) (Table 2). Ileal distension quality was most frequently rated the  
14 greatest for both cohorts. The Jejunum achieved good/adequate distension in  
15 15/32 (47%) ingesting more than 1L of mannitol versus 11/33 (33%) of  
16 patients ingesting 1L or less but this difference was not of statistical significance  
17 (-14% (-37 to 10)). Of note, the sample size was limited and therefore a test of  
18 proportions was not appropriate.  
19  
20  
21  
22  
23  
24  
25  
26  
27  
28  
29  
30  
31  
32  
33  
34  
35  
36

### 37 *Patient symptoms*

38 Overall, 143 (43%) of the 335 patients recruited to the main diagnostic accuracy  
39 trial had information on oral contrast type and volume ingested as well as  
40 providing a completed questionnaire immediately after MRE. Of these, 13  
41 patients were excluded (10 patients did not have a diagnosis of CD and 3  
42 withdrew from the trial). The final cohort consisted of 130 patients recruited  
43 across 6 sites, with 85[65%] receiving mannitol based oral preparation and  
44 45[35%] receiving PEG based oral preparation. Full patient characteristics are  
45  
46  
47  
48  
49  
50  
51  
52  
53  
54  
55  
56  
57  
58  
59  
60  
61  
62  
63  
64  
65

1 provided in Appendix 5. 78 (60%) of these 130 patients were also part of the  
2 cohort included in the qualitative distension study.  
3  
4

5  
6 The delayed patient symptom questionnaire (for symptoms over the two-days  
7 following MRE) had a variable return rate: mannitol 44/85 [52%] and PEG  
8 44/45 [98%]. All patients recording any symptom as 'not tolerable' immediately  
9 after MRE completed the delayed symptom questionnaire .  
10  
11

12  
13  
14  
15  
16  
17 The volumes of mannitol and PEG based oral preparation ingested is shown in  
18 Appendix 6. The volume of mannitol ingested ranged between 200ml and 1.8L  
19 with 34% [29/85] drinking 1L. The volume PEG ingested ranged between 300ml  
20 to 1.5L, with 33% [15/45] drinking 1L.  
21  
22  
23  
24  
25  
26

### 27 *Patient symptoms according to mannitol or PEG oral preparation*

28  
29 Baseline symptoms were comparable between mannitol and PEG groups  
30 (Appendix 7).  
31  
32  
33

34  
35  
36  
37 Tolerability of symptoms immediately after MRE and over the next 2 days is  
38 shown in Table 4 and graphically in Figure 1.  
39  
40  
41

42  
43 In general, symptom tolerability immediately after the MRE were comparable  
44 between the two preparations. For the mannitol group, vomiting and  
45 regurgitation were the best tolerated symptoms and abdominal pain the least.  
46  
47 Symptoms of fullness were graded 'very tolerable' in just 27% [12/45]) of  
48 patients ingesting PEG, a significantly lower proportion than for mannitol (44%  
49 [37/84]), a 17% difference (95%CI 0.6-34%)  
50  
51  
52  
53  
54  
55  
56  
57  
58  
59  
60  
61  
62  
63  
64  
65

1 For both preparations, tolerability of abdominal pain and diarrhoea was  
2 generally rated worse after 2 days then immediately after MRE, and again largely  
3 comparable between preparations. For example, 2 days post MRE, patients  
4 reported abdominal pain as very tolerable in 31% (15/49) and 43% [18/42]  
5 after ingesting mannitol and PEG respectively, a decrease from 61% (50/82) and  
6 58% (25/43) immediately after MRE. Similarly, diarrhoea was worse after 2  
7 days for both preparations, for example 32% (14/44) reporting it as very  
8 tolerable 2 days after PEG ingestion compared to 57% (25/44) immediately after  
9 MRE. Regurgitation improved after 2 days.  
10  
11  
12  
13  
14  
15  
16  
17  
18  
19  
20  
21  
22  
23  
24

#### 25 *Patient symptoms depending volume of oral preparation ingested*

26 The influence of ingested mannitol volume on patient symptoms is shown in  
27 Table 5. The response rate for the delayed symptom questionnaire was  
28 30/40[75%] and 25/45[56%] for the “1L or less” and “more than 1L” groups  
29 respectively.  
30  
31  
32  
33  
34  
35  
36  
37  
38

39 In general, symptoms immediately after MRE were comparable between those  
40 ingesting 1L or less compared to those ingesting more than 1 L.  
41  
42  
43  
44

45 Diarrhoea immediately after MRE was rated ‘very tolerable’ by 59% [23/39] of  
46 patient drinking 1L or less and 72% [31/43] of patients drinking more than 1L;  
47 not statistically significant.  
48  
49  
50  
51  
52  
53

54 Similarly, symptoms up to two days after MRE were comparable between the  
55 two volumes ingested. For example, abdominal pain/spasms were ‘very  
56 tolerable’ in 35% [9/26] of patients drinking 1L or less and 26% [6/23] of  
57  
58  
59  
60  
61  
62  
63  
64  
65

1 patients drinking more than 1L. Diarrhoea, was 'very tolerable' in 47% [14/30]  
2 of patient drinking 1L or less and 40% [10/25] of patients drinking more than 1L  
3  
4  
5  
6 The same pattern of worsening tolerability of abdominal pain and diarrhoea but  
7  
8 improved regurgitation after 2 days was observed in both volume groups.  
9

10  
11  
12  
13  
14  
15  
16  
17  
18  
19  
20  
21  
22  
23  
24  
25  
26  
27  
28  
29  
30  
31  
32  
33  
34  
35  
36  
37  
38  
39  
40  
41  
42  
43  
44  
45  
46  
47  
48  
49  
50  
51  
52  
53  
54  
55  
56  
57  
58  
59  
60  
61  
62  
63  
64  
65

## Discussion

1  
2  
3 We conducted a large multi-centre, prospective diagnostic accuracy trial  
4  
5 investigating the sensitivity of MRE and SBU. This afforded the opportunity to  
6  
7 prospectively assess the quality of bowel distension achieved in representative  
8  
9 clinical practice by two of the most commonly used MRE distention agents, and  
10  
11 to compare symptoms following ingestion. The results may also translate to  
12  
13 other luminal investigations requiring luminal distension such as CT  
14  
15 enterography and Hydrosonography.  
16  
17  
18  
19  
20  
21

22 To date, the majority of previous literature pertaining to oral contrast agents has  
23  
24 reported healthy volunteers who are unlikely to represent patients commonly  
25  
26 undergoing MRE [5, 10–15], or limited to retrospective studies of small numbers  
27  
28 at single centres [22, 25, 26]. In this regard, our work adds to the current  
29  
30 literature.  
31  
32  
33  
34  
35  
36

37 We found that, overall, there were no major differences in distention quality  
38  
39 between either mannitol based preparations or PEG. However, we did find some  
40  
41 evidence that whilst jejunal distension remains challenging, it is more commonly  
42  
43 good or excellent quality with mannitol (40%) compared to PEG (14%). This is  
44  
45 potentially an important observation given difficulties with jejunal distention  
46  
47 during MRE (as opposed to MR enteroclysis) and the potential impact on  
48  
49 diagnostic accuracy. Importantly, the two groups were generally well matched in  
50  
51 terms of presentation (new diagnosis verses relapse), presence of stenosis, and  
52  
53 history of prior surgical resection, which increases our confidence that our  
54  
55 findings are real and not secondary to unequal disease phenotypes across  
56  
57  
58  
59  
60  
61  
62  
63  
64  
65

1 cohorts. Although the colon is not the primary target for MRE, it is interesting to  
2 note superior transverse colonic distension with mannitol.  
3  
4  
5  
6

7 We also found ingesting more than 1L of mannitol did not confer any beneficial  
8 effect. This concurs with Ajaj et al who reported that in a study of 10 volunteers,  
9 1000, 1200, and 1500 ml of mannitol all gave similar quality distension[5].  
11  
12  
13

14 Overall, our data suggest there is no need for patients to ingest more than 1l of  
15 oral contrast. Perhaps surprisingly, we did not find any difference in the  
16 immediate or delayed symptoms experienced by patients, regardless of the  
17 volume of contrast. There was perhaps a trend for greater diarrhoea in those  
18 drinking more contrast, but this was not statistically significant perhaps due to  
19 underpowering.  
20  
21  
22  
23  
24  
25  
26  
27  
28  
29  
30

31 We also found mannitol and PEG were similarly tolerable, although patients  
32 ingesting PEG reported that fullness was significantly less tolerable immediately  
33 after MRE compared to those ingesting mannitol. We note that the proportion of  
34 patients ingesting 1l or more was lower in the PEG cohort than the mannitol  
35 cohort. Whilst the exact reasons for this observation are uncertain, it is possible  
36 the greater feelings of fullness in the PEG group led to reduced overall intake.  
37  
38  
39  
40  
41  
42  
43  
44  
45  
46  
47  
48

49 Of note, abdominal pain and diarrhoea increased over the 2 days after MRE  
50 compared to immediately afterwards. This is perhaps unsurprising as it takes  
51 time for contrast to traverse the gut, and concurs with a recent study in which  
52 oral contrast was rated the most unpleasant component of MRE; 18% of patients  
53  
54  
55  
56  
57  
58  
59  
60  
61  
62  
63  
64  
65



1 take longer than 1 day to recover [9]. Patients should be warned of this prior to  
2 MRE.  
3

4  
5  
6  
7 There are no published studies comparing mannitol and PEG in MRE but a  
8 recently published randomized controlled trial did compare the two  
9  
10 preparations in 70 patients undergoing CT enterography at a single-centre. Each  
11 patient underwent 2L of PEG bowel preparation prior to ingesting either 1.5L of  
12 mannitol or PEG solution. The study reported no significant differences in the  
13 quality of luminal distension between the agents but stated that patients  
14 undergoing mannitol preparation reported nausea as more tolerable, the taste as  
15 more acceptable, and were more willing to ingest again compared to patients  
16 undergoing PEG preparation. [27]  
17  
18  
19  
20  
21  
22  
23  
24  
25  
26  
27  
28  
29  
30

31 Our study has limitations. We investigated the impact of mannitol and PEG based  
32 oral preparations alone, as these were the two agents utilised at centres  
33 recruiting to the main diagnostic accuracy trial. The number of patients  
34 undergoing PEG based oral preparation were smaller, and as a result we were  
35 unable to incorporate the PEG cohort in assessment of the impact of ingested  
36 oral volume on either luminal distension or patient experience. Furthermore,  
37 while we had a good proportion of delayed patient experience questionnaires  
38 returned in the PEG cohort, this was much reduced in the mannitol cohort, which  
39 impairs comparison for delayed symptoms. This may in part reflect different  
40 tenacity of individual recruitment sites when encouraging patients to return  
41 questionnaires but risks some bias. Whilst we compare the main agents of the  
42 oral preparation, we acknowledge that some mannitol preparations utilised  
43  
44  
45  
46  
47  
48  
49  
50  
51  
52  
53  
54  
55  
56  
57  
58  
59  
60  
61  
62  
63  
64  
65

1 additives such as LBG or Carobel in small quantities and we have not assessed  
2 the specific contribution of these additives. Both readers for the qualitative  
3 assessment of luminal distension work at one centre which employed a Mannitol  
4 based preparation. This may introduce some bias related to their prior  
5 experience. For practical reasons other centres did not provide readers for this  
6 substudy although that would have been optimal. Agreement between readers  
7 was generally good, although less so for the terminal ileum in particular.  
8 Reassuringly though both readers were consistent in the relative grading of  
9 distension quality between the two preparations for all segments so any  
10 disagreement in absolute levels of distension did not impact on our main  
11 conclusion. Whilst the main trial evaluated the diagnostic accuracy of MRE (and  
12 SBU), this substudy was underpowered to draw conclusions on whether the  
13 differing quality of luminal distension affected the overall diagnostic accuracy.  
14 This would be a useful topic for further research. However it is reassuring that  
15 although distension quality was judged as excellent in slightly over 50% of  
16 terminal ileal segments, the results on the main trial showed MRE has high  
17 sensitivity for terminal ileal Crohn's disease, suggesting accurate diagnosis does  
18 not always require optimal distension. Anecdotally, the segmental small bowel  
19 distension will alter throughout the MRI acquisition (as the study typically takes  
20 30-45 minutes to acquire), it would be of interest to review whether this change  
21 in segmental distension is different for differing luminal preparation agents; this  
22 was felt to be outside the remit of this study.

23 Patients who reported at least one symptom as 'not tolerable' generally  
24 completed the day 2 questionnaire, whereas those less affected completed fewer.  
25  
26  
27  
28  
29  
30  
31  
32  
33  
34  
35  
36  
37  
38  
39  
40  
41  
42  
43  
44  
45  
46  
47  
48  
49  
50  
51  
52  
53  
54  
55  
56  
57  
58  
59  
60  
61  
62  
63  
64  
65

1 This may introduce spectrum bias, with a greater proportion returning this  
2 questionnaire more likely to experience less tolerable symptoms. Ours was a  
3 convenience sample based on data return, which could induce bias. Reassuringly,  
4 we found no major difference between PEG and mannitol cohorts regarding  
5 disease phenotype or baseline symptom level. Although to our knowledge ours is  
6 the largest prospective patient study on this topic to date, we did not perform a  
7 prior power calculation and so some of our comparisons are likely unpowered,  
8 for example the effects of agent volume on distension and symptoms.  
9

10  
11  
12 In summary, mannitol-based solutions and PEG generally achieve comparable  
13 distension quality and side effect profiles, although jejunal distension is more  
14 frequently of better quality with mannitol. Distension quality is not improved by  
15 ingestion of more than 1l, although doing so does not adversely influence patient  
16 tolerability.  
17  
18  
19  
20  
21  
22  
23  
24  
25  
26  
27  
28  
29  
30  
31  
32  
33  
34  
35  
36  
37  
38  
39  
40  
41  
42  
43  
44  
45  
46  
47  
48  
49  
50  
51  
52  
53  
54  
55  
56  
57  
58  
59  
60  
61  
62  
63  
64  
65

1  
2  
3  
4  
5  
6  
7  
8  
9

### ***Funding***

This study has received funding by NIHR HTA 11/23/01 and the UCLH NIHR BRC.

### ***Guarantor:***

The scientific guarantor of this publication is Professor Stuart A Taylor.

### ***Conflict of Interest:***

The authors of this manuscript declare no relationships with any companies whose products or services may be related to the subject matter of the article.

### ***Statistics and Biometry:***

Professor Sue Mallett kindly provided statistical advice for this manuscript.

### ***Informed Consent:***

Written informed consent was obtained from all subjects (patients) in this study.

### ***Ethical Approval:***

Institutional Review Board approval was obtained.

### ***Study subjects or cohorts overlap:***

A subset of 66 patients from this study have been previously reported in Taylor SA, Mallett S, Bhatnagar G, et al. (2019) Magnetic resonance enterography compared with ultrasonography in newly diagnosed and relapsing crohn's disease patients: The METRIC diagnostic accuracy study. Health Technol Assess (Rockv) 23:vii-161. doi: 10.3310/hta23420.

### ***Methodology***

- prospective
  - observational
  - multicenter study
- 34  
35  
36  
37  
38  
39  
40  
41  
42  
43  
44  
45  
46  
47  
48  
49  
50  
51  
52  
53  
54  
55  
56  
57  
58  
59  
60  
61  
62  
63  
64  
65

## References

1. Taylor SA, Mallett S, Bhatnagar G, et al. (2018) Diagnostic accuracy of magnetic resonance enterography and small bowel ultrasound for the extent and activity of newly diagnosed and relapsed Crohn ' s disease ( METRIC ): a multicentre trial. *Lancet Gastroenterol Hepatol* 3:548–58. doi: 10.1016/S2468-1253(18)30161-4
2. K.Jesuratnam-Nielsen, Løgager VB, Rezanavaz-Gheshlagh B, et al. (2015) Plain magnetic resonance imaging as an alternative in evaluating inflammation and bowel damage in inflammatory bowel disease - A prospective comparison with conventional magnetic resonance follow-through. *Scand J Gastroenterol*. doi: 10.3109/00365521.2014.1003398 LK
3. Bruining DH, Bhatnagar G, Rimola J, et al. (2015) CT and MR enterography in Crohn's disease: current and future applications. *Abdom Imaging*. doi: 10.1007/s00261-015-0360-9
4. Laghi A, Paolantonio P, Iafrate F, et al. MR of the small bowel with a biphasic oral contrast agent (polyethylene glycol): technical aspects and findings in patients affected by Crohn's disease. *Radiol medica* 106:18–27.
5. Ajaj W, Goehde SC, Schneemann H, et al. (2004) Dose optimization of mannitol solution for small bowel distension in MRI. *J Magn Reson Imaging* 20:648–653. doi: 10.1002/jmri.20166
6. Maccioni F, Viscido A, Marini M, Caprilli R (2002) MRI evaluation of Crohn's disease of the small and large bowel with the use of negative superparamagnetic oral contrast agents. *Abdom Imaging*. doi: 10.1007/s00261-001-0119-3

- 1  
2  
3  
4  
5  
6  
7  
8  
9  
10  
11  
12  
13  
14  
15  
16  
17  
18  
19  
20  
21  
22  
23  
24  
25  
26  
27  
28  
29  
30  
31  
32  
33  
34  
35  
36  
37  
38  
39  
40  
41  
42  
43  
44  
45  
46  
47  
48  
49  
50  
51  
52  
53  
54  
55  
56  
57  
58  
59  
60  
61  
62  
63  
64  
65
7. Ajaj W, Goehde SC, Schneemann H, et al. (2004) Oral contrast agent for small bowel MRI: Comparison of different additives to optimize bowel distension. *Eur Radiol*. doi: 10.1007/s00330-003-2177-0
8. Taylor SA, Avni F, Cronin CG, Hoeffel c, Kim SH, Laghi A, Napolitano M, Petit P, Rimola J, Tolan DJ, Torkzad MR, Zappa M, Bhatnagar G, Puylaert CAJ SJ (2017) The first joint ESGAR/ ESPR consensus statement on the technical performance of cross-sectional small bowel and colonic imaging. *Eur Radiol* 27:2570–2582. doi: 10.1007/s00330-016-4615-9
9. Miles A, Bhatnagar G, Halligan S, et al. (2018) Magnetic resonance enterography, small bowel ultrasound and colonoscopy to diagnose and stage Crohn’s disease: patient acceptability and perceived burden. *Eur Radiol* 43–45. doi: 10.1007/s00330-018-5661-2
10. Young BM, Fletcher JG, Booya F, et al. (2008) Head-to-head comparison of oral contrast agents for cross-sectional enterography: Small bowel distention, timing, and side effects. *J Comput Assist Tomogr* 32:32–38. doi: 10.1097/RCT.0b013e318061961d
11. Sood RR, Joubert I, Franklin H, et al. (2002) Small bowel MRI: Comparison of a polyethylene glycol preparation and water as oral contrast media. *J Magn Reson Imaging* 15:401–408. doi: 10.1002/jmri.10090
12. Lauenstein TC, Schneemann H, Vogt FM, et al. (2003) Optimization of Oral Contrast Agents for MR Imaging of the Small Bowel 1. *Radiology* 228:279–283.
13. Kuehle C a, Ajaj W, Ladd SC, et al. (2006) Hydro-MRI of the small bowel: effect of contrast volume, timing of contrast administration, and data acquisition on bowel distention. *AJR Am J Roentgenol* 187:W375-85. doi:

10.2214/AJR.05.1079

- 1  
2  
3  
4  
5  
6  
7  
8  
9  
10  
11  
12  
13  
14  
15  
16  
17  
18  
19  
20  
21  
22  
23  
24  
25  
26  
27  
28  
29  
30  
31  
32  
33  
34  
35  
36  
37  
38  
39  
40  
41  
42  
43  
44  
45  
46  
47  
48  
49  
50  
51  
52  
53  
54  
55  
56  
57  
58  
59  
60  
61  
62  
63  
64  
65
14. Kinner S, Kuehle CA, Herbig S, et al. (2008) MRI of the small bowel: Can sufficient bowel distension be achieved with small volumes of oral contrast? *Eur Radiol* 18:2542–2548. doi: 10.1007/s00330-008-1041-7
15. Ajaj W, Goyen M, Schneemann H, et al. (2005) Oral contrast agents for small bowel distension in MRI: Influence of the osmolarity for small bowel distention. *Eur Radiol* 15:1400–1406. doi: 10.1007/s00330-005-2711-3
16. Laghi, Andrea, Pasquale Paolantonio, Franco Iafrate, Osvaldo Borrelli, Lucia Dito, Ernesto Tomei, Salvatore Cucchiara and RP MR of the Small Bowel with a Biphasic Oral Contrast Agent (polyethylene Glycol): Technical Aspects and Findings in Patients Affected by Crohn’s Disease. *Radiol. Medica*
17. Absah I, Bruining DH, Matsumoto JM, et al. (2012) MR enterography in pediatric inflammatory bowel disease: Retrospective assessment of patient tolerance, image quality, and initial performance estimates. *Am J Roentgenol* 199:367–375. doi: 10.2214/AJR.11.8363
18. Gottumukkala R V., LaPointe A, Sargent D, Gee MS (2019) Comparison of three oral contrast preparations for magnetic resonance enterography in pediatric patients with known or suspected Crohn disease: a prospective randomized trial. *Pediatr Radiol*. doi: 10.1007/s00247-019-04378-5
19. Taylor S, Mallett S, Bhatnagar G, et al. (2014) METRIC (MREnterography or ulTRasound in Crohn’s disease): a study protocol for a multicentre, non-randomised, single-arm, prospective comparison study of magnetic resonance enterography and small bowel ultrasound compared to a reference standard in those . *BMC Gastroenterol* 14:142. doi:

10.1186/1471-230X-14-142

- 1  
2  
3  
4  
5  
6  
7  
8  
9  
10  
11  
12  
13  
14  
15  
16  
17  
18  
19  
20  
21  
22  
23  
24  
25  
26  
27  
28  
29  
30  
31  
32  
33  
34  
35  
36  
37  
38  
39  
40  
41  
42  
43  
44  
45  
46  
47  
48  
49  
50  
51  
52  
53  
54  
55  
56  
57  
58  
59  
60  
61  
62  
63  
64  
65
20. Taylor SA, Mallett S, Bhatnagar G, et al. (2019) Magnetic resonance enterography compared with ultrasonography in newly diagnosed and relapsing crohn's disease patients: The METRIC diagnostic accuracy study. *Health Technol Assess (Rockv)* 23:vii–161. doi: 10.3310/hta23420
21. Taylor SA, Halligan S, Goh V, et al. (2003) Optimizing Colonic Distention for Multi – Detector Row CT Colonography : Effect of Hyoscine Butylbromide and Rectal Balloon Catheter 1. *Radiology* 229:99–108.
22. Saini S, Colak E, Anthwal S, et al. (2014) Comparison of 3% sorbitol vs psyllium fibre as oral contrast agents in MR enterography. *Br J Radiol*. doi: 10.1259/bjr.20140100
23. Gwet K (2014) *Handbook of inter-rater reliability* fourth edition.
24. Landis J, Koch G (1977) The measurement of observer agreement for categorical data. *Biometrics* Mar:159–74.
25. Bekendam MIJ, Puylaert CAJ, Phoa SKSS, et al. (2017) Shortened oral contrast preparation for improved small bowel distension at MR enterography. *Abdom Radiol*. doi: 10.1007/s00261-017-1133-4
26. Wong J, Moore H, Roger M, McKee C (2016) CT enterography: Mannitol versus VoLumen. *J Med Imaging Radiat Oncol* 60:593–598. doi: 10.1111/1754-9485.12486
27. Zheng MQ, Zeng QS, Yu YQ, et al. (2020) Evaluation of the performance of two neutral oral contrast agents in computed tomography enterography: A randomized controlled trial. *J Dig Dis* 21:112–119. doi: 10.1111/1751-2980.12835



**Table 1: Number of patients\segments achieving good (or excellent) distension according to oral contrast agent**

|                  | Number of patients/segments where distension was graded as excellent/good by at least one observer |                                                 | Difference between contrasts**<br>% (95% CI) |
|------------------|----------------------------------------------------------------------------------------------------|-------------------------------------------------|----------------------------------------------|
|                  | Mannitol (n=68)<br>n/N* (%)                                                                        | Polyethylene Glycol (PEG)<br>(n=37)<br>n/N* (%) |                                              |
| Patients         | 37/68 (54)                                                                                         | 17/37 (46)                                      | 8 (-11 to 28)                                |
| Segments         |                                                                                                    |                                                 |                                              |
| Duodenum         | 11/68 (16)                                                                                         | 5/37 (14)                                       | 2 (-11 to 17)                                |
| Jejunum          | 27/68 (40)                                                                                         | 5/37 (14)                                       | 26 (10 to 42)<br>p=0.0053                    |
| Ileum            | 51/68 (75)                                                                                         | 28/37 (76)                                      | -1 (-18 to 17)                               |
| Terminal Ileum   | 37/68 (54)                                                                                         | 20/37 (54)                                      | 0 (-20 to 20)                                |
| Caecum           | 22/51 (43)                                                                                         | 14/28 (50)                                      | -7 (-30 to 16)                               |
| Ascending colon  | 43/61 (70)                                                                                         | 23/33 (70)                                      | 0 (-19 to 20)                                |
| Transverse colon | 41/64 (64)                                                                                         | 16/37 (43)                                      | 20 (0 to 41)<br>p=0.0420                     |

\*In some patients segments had been excised and so could not be assessed.

\*\* Mannitol minus Polyethylene Glycol (PEG)

**Table 2: Number of patients/segments achieving good or excellent distension according to mannitol oral contrast volume ingested**

|                | Volume less or equal than 1L<br>N* (%) | Volume more than 1L<br>N* (%) | Difference**<br>% (95% CI) |
|----------------|----------------------------------------|-------------------------------|----------------------------|
| Patients       | 17/33 (52)                             | 18/32 (56)                    | -5 (-29 to 19)             |
| Segments       |                                        |                               |                            |
| Duodenum       | 5/33 (15)                              | 5/32 (16)                     |                            |
| Jejunum        | 11/33 (33)                             | 15/32 (47)                    | -14 (-37 to 10)            |
| Ileum          | 24/33 (73)                             | 25/32 (78)                    |                            |
| Terminal_ileum | 17/33 (52)                             | 19/32 (59)                    |                            |
| Caecum         | 8/19 (42)                              | 12/30 (40)                    |                            |
| Ascending_C    | 18/27 (67)                             | 23/31 (74)                    |                            |
| Transverse_C   | 17/29 (59)                             | 23/32 (72)                    | -13 (-37 to 10)            |

\*In some patients segments had been excised and so could not be assessed.

\*\* Volume less or equal than 1L vs Volume more than 1L (The statistical power is limited and therefore unable to show a statistical difference between proportions)

**Table 3: Excellent or good distension overall and by segment for the two readers**

|                |           | <b>Reader 1</b> | <b>Reader 2</b> | <b>Agreement</b>  | <b>Gwet's AC</b> |
|----------------|-----------|-----------------|-----------------|-------------------|------------------|
| <b>Segment</b> | <b>N*</b> | <b>N (%)</b>    | <b>N (%)</b>    | <b>% (95% CI)</b> |                  |
| Overall        | 105       | 48 (45)         | 45 (42)         | 82 (75 to 90)     | 0.65             |
| Duodenum       | 105       | 11 (10)         | 9 (8)           | 87 (80 to 93)     | 0.84             |
| Jejunum        | 105       | 21 (20)         | 22 (21)         | 79 (71 to 86)     | 0.68             |
| Ileum          | 105       | 63 (59)         | 70 (65)         | 73 (64 to 81)     | 0.49             |
| Terminal_ileum | 105       | 52 (49)         | 30 (28)         | 68 (59 to 77)     | 0.40             |
| Caecum         | 80        | 30 (37)         | 31 (39)         | 84 (75 to 92)     | 0.69             |
| Ascending_C    | 94        | 61 (64)         | 53 (55)         | 77 (69 to 86)     | 0.56             |
| Transverse_C   | 101       | 53 (51)         | 33 (32)         | 69 (60 to 78)     | 0.40             |

\*In some patients segments had been excised and so could not be assessed.

**Table 4: Patient symptoms by contrast agent and time point following MRE**

|                                       | Mannitol (N=85)      |                      |                      | Klean Prep (N=45)    |                      |                      |
|---------------------------------------|----------------------|----------------------|----------------------|----------------------|----------------------|----------------------|
|                                       | Very tolerable       | Moderately tolerable | Not tolerable        | Very tolerable       | Moderately tolerable | Not tolerable        |
|                                       | n/N <sup>a</sup> (%) | n/N <sup>a</sup> (%) | n/N <sup>a</sup> (%) | n/N <sup>a</sup> (%) | n/N <sup>a</sup> (%) | n/N <sup>a</sup> (%) |
| Symptoms immediately following MRE    |                      |                      |                      |                      |                      |                      |
| A feeling of fullness                 | 37/84 (44*)          | 46/84 (55)           | 1/84 (1)             | 12/45 (27*)          | 32/45 (71)           | 1/45 (2)             |
| Regurgitation                         | 62/83 (75)           | 18/83 (22)           | 3/83 (4)             | 31/43 (72)           | 8/43 (19)            | 4/43 (9)             |
| Vomiting                              | 72/81 (89)           | 7/81 (9)             | 2/81 (2)             | 38/44 (86)           | 3/44 (7)             | 3/44 (7)             |
| Abdominal pain/ spasms                | 50/82 (61)           | 28/82 (34)           | 4/82 (5)             | 25/43 (58)           | 14/43 (33)           | 4/43 (9)             |
| Diarrhoea                             | 54/82 (66)           | 24/82 (29)           | 4/82 (5)             | 25/44 (57)           | 12/44 (27)           | 7/44 (16)            |
| Symptoms for the 2 days following MRE |                      |                      |                      |                      |                      |                      |
| Flatulence                            | 23/48 (48)           | 20/48 (42)           | 5/48 (10)            | 22/42 (52)           | 15/42 (36)           | 5/42 (12)            |
| Regurgitation                         | 39/43 (91)           | 4/43 (9)             | 0/43 (0)             | 33/41 (80)           | 6/41 (15)            | 2/41 (5)             |
| Vomiting                              | 39/44 (89)           | 3/44 (7)             | 2/44 (5)             | 36/41 (88)           | 3/41 (7)             | 2/41 (5)             |
| Abdominal pain/ spasms                | 15/49 (31)           | 29/49 (59)           | 5/49 (10)            | 18/42 (43)           | 19/42 (45)           | 5/42 (12)            |
| Diarrhoea                             | 24/55 (44)           | 22/55 (40)           | 9/55 (16)            | 14/44 (32)           | 24/44 (55)           | 6/44 (14)            |

a The number of patients answering each survey question varies, so numbers and percentages are given for those responding.

\*The only significant difference in experience between patients receiving mannitol and those receiving Klean Prep was in the feeling of fullness immediately after contrast, where 17% more patients (95% CI 0.6 to 34%) had a very tolerable feeling of fullness with mannitol compared to Klean Prep.

**Table 5: Patient experience according to mannitol oral contrast volume ingested**

|                                     | Volume less or equal than 1L<br>(N=40) |                      |                      | Volume more than 1L<br>(N=45) |                      |                      |
|-------------------------------------|----------------------------------------|----------------------|----------------------|-------------------------------|----------------------|----------------------|
|                                     | Very tolerable                         | Moderately tolerable | Not tolerable        | Very tolerable                | Moderately tolerable | Not tolerable        |
|                                     | n/N <sup>a</sup> (%)                   | n/N <sup>a</sup> (%) | n/N <sup>a</sup> (%) | n/N <sup>a</sup> (%)          | n/N <sup>a</sup> (%) | n/N <sup>a</sup> (%) |
| Symptoms immediately following MRE  |                                        |                      |                      |                               |                      |                      |
| A feeling of fullness               | 18/39<br>(46)                          | 20/39 (51)           | 1/39 (3)             | 19/45<br>(42)                 | 26/45 (58)           | 0/45 (0)             |
| Regurgitation                       | 30/40<br>(75)                          | 10/40 (25)           | 0/40 (0)             | 32/43<br>(74)                 | 8/43 (19)            | 3/43 (7)             |
| Vomiting                            | 34/38<br>(89)                          | 4/38 (11)            | 0/38 (0)             | 38/43<br>(88)                 | 3/43 (7)             | 2/43 (5)             |
| Abdominal pain/ spasms              | 25/39<br>(64)                          | 13/39 (33)           | 1/39 (3)             | 25/43<br>(58)                 | 15/43 (35)           | 3/43 (7)             |
| Diarrhoea                           | 23/39<br>(59)                          | 14/39 (36)           | 2/39 (5)             | 31/43<br>(72)                 | 10/43 (23)           | 2/43 (5)             |
| Symptoms up to 2 days following MRE |                                        |                      |                      |                               |                      |                      |
| Flatulence                          | 14/26<br>(54)                          | 12/26 (46)           | 0/26 (0)             | 9/22<br>(41)                  | 8/22 (36)            | 5/22<br>(23)         |
| Regurgitation                       | 23/24<br>(96)                          | 1/24 (4)             | 0/24 (0)             | 16/19<br>(84)                 | 3/19 (16)            | 0/19 (0)             |
| Vomiting                            | 23/25<br>(92)                          | 2/25 (8)             | 0/25 (0)             | 16/19<br>(84)                 | 1/19 (5)             | 2/19<br>(11)         |
| Abdominal pain/ spasms              | 9/26<br>(35)                           | 14/26 (54)           | 3/26<br>(12)         | 6/23<br>(26)                  | 15/23 (65)           | 2/23 (9)             |
| Diarrhoea                           | 14/30<br>(47)                          | 11/30 (37)           | 5/30<br>(17)         | 10/25<br>(40)                 | 11/25 (44)           | 4/25<br>(16)         |

The number of patients answering each survey question varies, so numbers and percentages are given for those responding.

**Figure 1: Comparison of patient symptoms dependent on oral preparation ((a)mannitol based and (b) PEG based) immediately after and up to two days after the MRE**

Figure 1a

[Click here to access/download;Figure;Figure 1a](#)

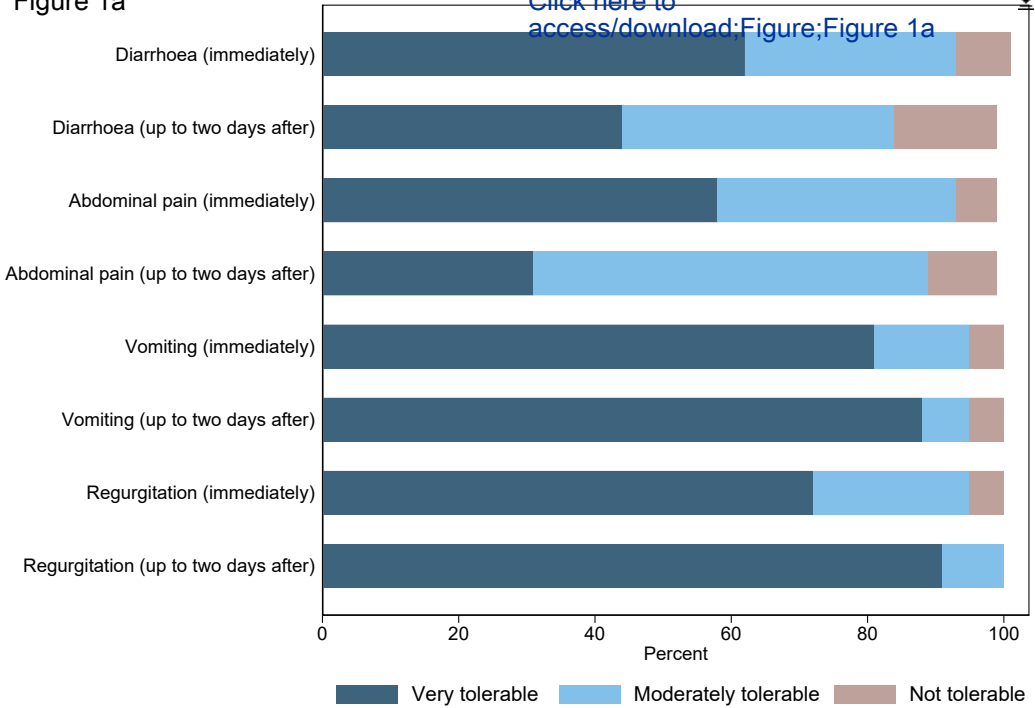

Figure 1b

[Click here to access/download;Figure;Figure 1b](#)

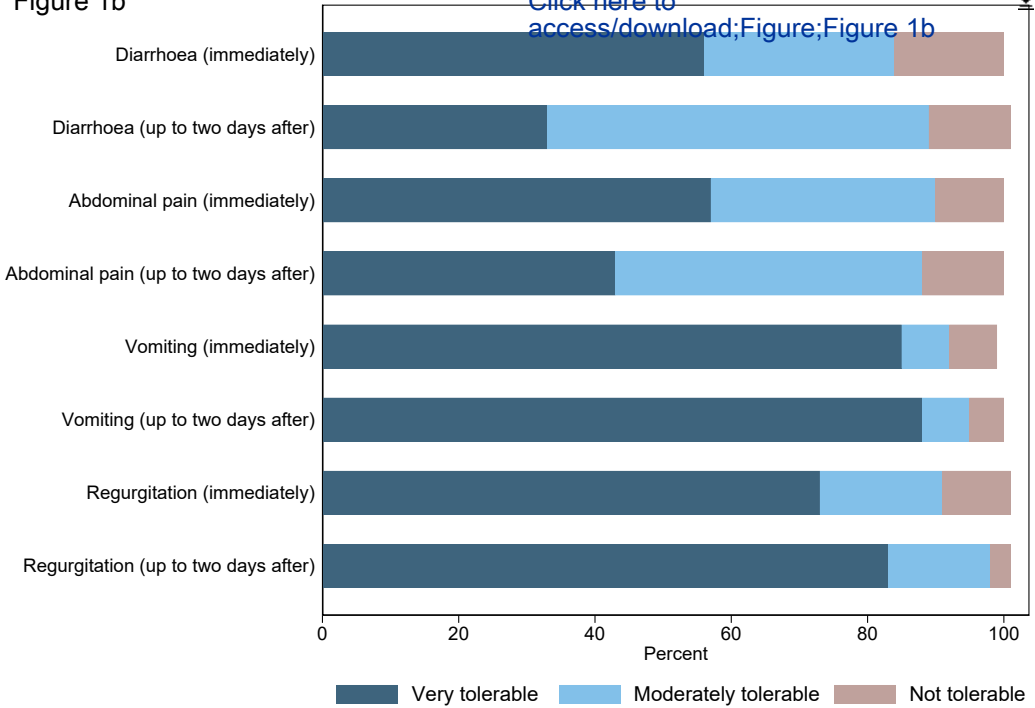

***Funding***

This study has received funding by NIHR HTA 11/23/01 and the UCLH NIHR BRC.

***Guarantor:***

The scientific guarantor of this publication is Professor Stuart A Taylor.

***Conflict of Interest:***

The authors of this manuscript declare no relationships with any companies whose products or services may be related to the subject matter of the article.

***Statistics and Biometry:***

Professor Sue Mallett kindly provided statistical advice for this manuscript.

***Informed Consent:***

Written informed consent was obtained from all subjects (patients) in this study.

***Ethical Approval:***

Institutional Review Board approval was obtained.

***Study subjects or cohorts overlap:***

A subset of 66 patients from this study have been previously reported in Taylor SA, Mallett S, Bhatnagar G, et al. (2019) Magnetic resonance enterography compared with ultrasonography in newly diagnosed and relapsing crohn's disease patients: The METRIC diagnostic accuracy study. Health Technol Assess (Rockv) 23:vii-161. doi: 10.3310/hta23420.

***Methodology***

- prospective
- observational
- multicenter study



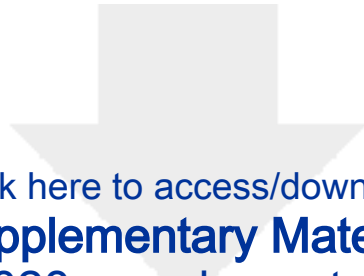

[Click here to access/download](#)

**Supplementary Material**

EURA-D-21-04028\_supplementary material.docx

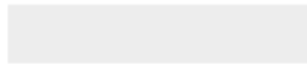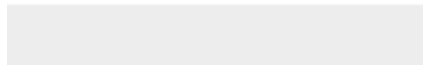

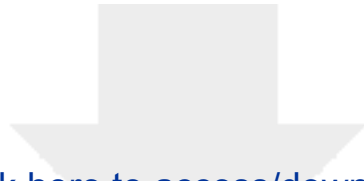

Click here to access/download  
**Supplementary Material**  
EURA-D-21-04028\_appendix 2.pdf

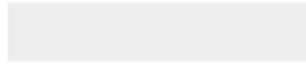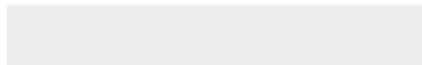



[Click here to access/download](#)

**Not for review**  
Title page.docx



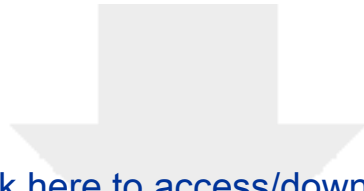

[Click here to access/download](#)

**Not for review**

**BLIND revised Manuscript with comments.docx**

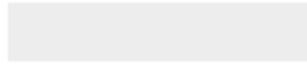



Click here to access/download  
**Not for review**  
Disclosure paragraph.docx

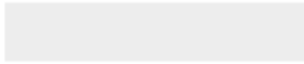



[Click here to access/download](#)

**Not for review**

**BLIND revised Manuscript clean.docx**

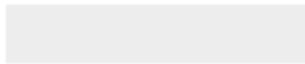

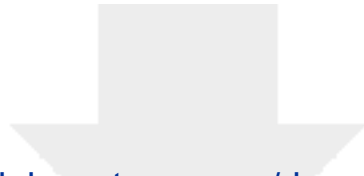

[Click here to access/download](#)

**Not for review**

[Appendix 2 BLIND CRF .pdf](#)

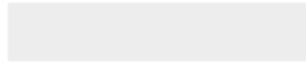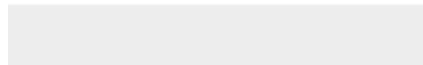



[Click here to access/download](#)  
**Not for review**  
[Appendix 4 Figure 2.pdf](#)







Click here to access/download  
**Not for review**  
Appendix 6 Figure 3.pdf





[Click here to access/download](#)

**Not for review**

[Appendices clean version.docx](#)



Supplement: MOESM2 [file 20188812]
